# Supplementary material for: Stress Management Apps: Systematic Search and Multidimensional Assessment of Quality and Characteristics
Source: PubMed Central journal article supplement (PMC10498318; doi:10.2196/42415), 2023-08-29
Supplement: mhealth_v11i1e42415_app3.pdf [file mhealth_v11i1e42415_app3.pdf]

**Multimedia Appendix 3.** Quality ratings of all included stress management apps.

| App name                                         | Overall quality | User Engagement | Functionality | Aesthetics | Information quality |
|--------------------------------------------------|-----------------|-----------------|---------------|------------|---------------------|
| Happify: bei Ärger und Stress                    | 4,36            | 4,30            | 4,63          | 4,50       | 4,00                |
| Sanvello: Stress & Anxiety Help                  | 4,22            | 4,10            | 4,38          | 4,83       | 3,57                |
| Headspace: Meditation & Schlaf                   | 4,21            | 3,80            | 4,50          | 4,83       | 3,71                |
| go4health – gesund leben                         | 4,19            | 4,00            | 4,75          | 4,17       | 3,86                |
| BamBu Meditation & Achtsamkeit                   | 4,16            | 4,30            | 4,25          | 4,50       | 3,57                |
| Ease: Achtsamkeit & Meditation                   | 4,13            | 3,90            | 4,88          | 4,33       | 3,43                |
| Aurum - Stress, Anxiety, Mental Health, Therapy. | 4,12            | 3,60            | 4,75          | 4,50       | 3,64                |
| Pocketcoach - Anxiety Helper                     | 4,12            | 4,00            | 4,63          | 4,50       | 3,36                |
| Balloon – Meditation für alle                    | 4,10            | 3,80            | 4,88          | 4,00       | 3,71                |
| Keep Yoga - Yoga & Meditation                    | 4,09            | 4,60            | 4,13          | 4,50       | 3,14                |
| DeStressify-FREE Stress Relief                   | 4,08            | 4,10            | 4,38          | 4,00       | 3,86                |
| Sanvello (formerly Pacifica)                     | 4,08            | 4,00            | 4,38          | 4,17       | 3,79                |
| Mindshine - Self Care Coaching                   | 4,07            | 4,10            | 4,50          | 4,67       | 3,00                |
| Meditopia: Meditation Deutsch                    | 4,06            | 3,90            | 4,63          | 4,50       | 3,21                |
| Mind Ease: Anxiety Relief                        | 4,06            | 4,20            | 4,25          | 4,50       | 3,29                |
| Wellness Coach:meditation.live                   | 4,06            | 3,70            | 4,50          | 4,67       | 3,36                |
| Headspace: Meditation & Schlaf                   | 4,05            | 4,00            | 4,50          | 5,00       | 2,71                |
| reviti life                                      | 4,02            | 4,30            | 4,38          | 4,33       | 3,07                |
| Balance: Meditation                              | 3,99            | 4,10            | 4,75          | 4,67       | 2,43                |
| Meditopia: Meditation Deutsch                    | 3,96            | 3,90            | 4,63          | 4,33       | 3,00                |
| BamBu: Meditation für Entspannung & Schlaf       | 3,94            | 4,00            | 4,50          | 4,33       | 2,93                |

|                                                  |      |      |      |      |      |
|--------------------------------------------------|------|------|------|------|------|
| Mindshine - Personal Training for the Mind       | 3,93 | 3,90 | 4,00 | 4,67 | 3,14 |
| Wellness Coach: Meditation.live                  | 3,92 | 3,70 | 4,38 | 4,33 | 3,29 |
| DeStressify Stress Relief                        | 3,88 | 3,40 | 4,00 | 3,83 | 4,29 |
| Meditation & Klänge von Verv                     | 3,87 | 3,20 | 4,50 | 4,83 | 2,93 |
| Aura: Sleep & Mindfulness                        | 3,81 | 4,20 | 4,13 | 4,50 | 2,43 |
| Meditation, Sleep & Focus App                    | 3,81 | 3,20 | 4,50 | 4,67 | 2,86 |
| Pocketcoach - Anxiety Helper                     | 3,80 | 3,50 | 4,38 | 4,17 | 3,14 |
| Breethe - Calm Meditation, Sleep & Mindfulness   | 3,78 | 3,70 | 4,00 | 4,83 | 2,57 |
| Stop, Breathe & Think: Meditation & Mindfulness  | 3,77 | 3,50 | 3,88 | 4,00 | 3,71 |
| Insight Timer - Meditation                       | 3,75 | 3,70 | 4,50 | 4,17 | 2,64 |
| Stress-Mentor                                    | 3,75 | 3,70 | 3,88 | 4,00 | 3,43 |
| Happify: bei Ärger und Stress                    | 3,74 | 4,10 | 4,38 | 4,33 | 2,14 |
| Wim Hof Method                                   | 3,72 | 2,50 | 4,38 | 4,17 | 3,86 |
| AOK Relax                                        | 3,72 | 3,30 | 4,75 | 3,83 | 3,00 |
| Woebot: Your Self-Care Expert                    | 3,72 | 3,30 | 4,25 | 3,83 | 3,50 |
| Ten Percent Happier - Meditation & Sleep         | 3,71 | 3,30 | 4,75 | 4,17 | 2,64 |
| Mindrise: Sleep, Meditation, Music & Astrology   | 3,70 | 3,80 | 4,13 | 4,50 | 2,36 |
| Emoski                                           | 3,69 | 4,10 | 3,88 | 4,00 | 2,79 |
| Shine: Calm Anxiety & Stress                     | 3,68 | 3,60 | 4,25 | 4,17 | 2,71 |
| NeuroNation Ease: Achtsamkeit & Meditation       | 3,68 | 3,40 | 4,50 | 4,17 | 2,64 |
| Peace: Calm, Sleep, Meditation                   | 3,67 | 3,60 | 3,88 | 4,50 | 2,71 |
| AOK Lebe Balance                                 | 3,66 | 3,90 | 3,88 | 4,00 | 2,86 |
| MYditation - Meditation für Entspannung & Schlaf | 3,65 | 3,70 | 3,75 | 4,17 | 3,00 |
| Meditation und Entspannung mit Cosmiq            | 3,64 | 3,10 | 4,25 | 4,33 | 2,86 |

|                                                     |      |      |      |      |      |
|-----------------------------------------------------|------|------|------|------|------|
| Insight Timer - Free Meditation App                 | 3,63 | 3,70 | 4,25 | 4,00 | 2,57 |
| De-StressMe: CBT Tools to Manage Stress             | 3,61 | 4,00 | 4,50 | 4,00 | 1,93 |
| eleMental                                           | 3,60 | 3,80 | 3,50 | 4,33 | 2,79 |
| Meditation, Sleep & Relax - Urban Yogi mindfulness  | 3,60 | 3,90 | 3,88 | 4,00 | 2,64 |
| Balloon - Meditation für alle                       | 3,60 | 3,40 | 4,38 | 4,33 | 2,29 |
| Breathe: Meditation & Schlaf                        | 3,55 | 3,70 | 4,25 | 4,17 | 2,07 |
| 7Mind: Meditation reinvented                        | 3,51 | 3,40 | 3,88 | 4,33 | 2,43 |
| MoodSpace - Stress, anxiety, & low mood self-help   | 3,49 | 3,30 | 3,38 | 4,00 | 3,29 |
| Youper - Emotional Health                           | 3,47 | 3,20 | 3,75 | 4,00 | 2,93 |
| Resility Personal Biofeedback                       | 3,47 | 2,40 | 4,50 | 4,33 | 2,64 |
| Serenity: Guided Meditation & Mindfulness           | 3,47 | 3,10 | 4,25 | 3,67 | 2,86 |
| Music Zen: Entspannende Klänge                      | 3,42 | 3,00 | 4,38 | 4,50 | 1,79 |
| Present Mind - Mindfulness                          | 3,41 | 2,70 | 4,38 | 3,33 | 3,21 |
| Welzen: meditations to relax, focus & sleep better  | 3,40 | 3,30 | 4,13 | 3,83 | 2,36 |
| Key Meditation                                      | 3,40 | 2,50 | 4,38 | 4,00 | 2,71 |
| Rize: Relaxation Mental Stress                      | 3,40 | 3,50 | 3,88 | 3,50 | 2,71 |
| WhyFit                                              | 3,39 | 2,70 | 4,13 | 3,67 | 3,07 |
| Breathe+                                            | 3,37 | 3,40 | 4,88 | 3,50 | 1,71 |
| Calm in the Storm: Stress Management and Relaxation | 3,37 | 3,10 | 3,50 | 3,67 | 3,21 |
| StressLess                                          | 3,36 | 2,60 | 4,00 | 3,50 | 3,36 |
| Free Guided Meditation and Relaxation               | 3,36 | 3,20 | 4,38 | 4,17 | 1,71 |
| AOK Relax                                           | 3,34 | 2,60 | 4,63 | 3,00 | 3,14 |
| 7Mind Meditation & Achtsamkeit                      | 3,29 | 3,00 | 4,25 | 4,00 | 1,93 |
| DayStress Relief                                    | 3,29 | 2,90 | 4,75 | 3,50 | 2,00 |

|                                                    |      |      |      |      |      |
|----------------------------------------------------|------|------|------|------|------|
| Relax Lite: Stress and Anxiety Relief              | 3,26 | 2,70 | 4,50 | 4,00 | 1,86 |
| Serenity: Meditation deutsch                       | 3,26 | 2,80 | 4,63 | 3,67 | 1,93 |
| Guided Meditation & Relaxation                     | 3,24 | 2,70 | 4,75 | 4,00 | 1,50 |
| 7pranayama - Yoga Daily Breath Fitness Yoga & Calm | 3,23 | 3,20 | 3,88 | 2,83 | 3,00 |
| Resility Stress Management & Biofeedback           | 3,22 | 3,10 | 4,13 | 3,50 | 2,14 |
| Meditation for Anxiety and Stress                  | 3,20 | 2,80 | 4,00 | 3,00 | 3,00 |
| Medativo - Meditation Timer                        | 3,20 | 3,10 | 4,13 | 3,50 | 2,07 |
| RelaxApp - Meditation Relaxation Chromotherapy     | 3,19 | 3,00 | 4,38 | 3,33 | 2,07 |
| Restful                                            | 3,18 | 3,00 | 3,50 | 4,17 | 2,07 |
| Wildfulness 2 - Natur klingt                       | 3,16 | 1,70 | 4,50 | 4,50 | 1,93 |
| Mindfulness & Guided Sleep Meditation              | 3,16 | 2,60 | 3,50 | 3,67 | 2,86 |
| Relaxation Coach                                   | 3,15 | 2,10 | 4,38 | 4,00 | 2,14 |
| The SoSial                                         | 3,15 | 2,30 | 3,63 | 3,83 | 2,86 |
| Wellbody                                           | 3,14 | 2,40 | 4,25 | 4,00 | 1,93 |
| Prime - Psychological Security                     | 3,13 | 2,80 | 3,75 | 3,33 | 2,64 |
| Calmcast                                           | 3,11 | 2,80 | 4,25 | 3,33 | 2,07 |
| BrainTap Pro                                       | 3,11 | 2,40 | 4,38 | 3,67 | 2,00 |
| Mindfulness Meditation & Exercises                 | 3,10 | 2,40 | 4,13 | 3,67 | 2,21 |
| Happy Being- Meditate, De-stress, Sleep, Wellbeing | 3,08 | 3,30 | 3,50 | 3,67 | 1,86 |
| Life Coach, CBT, Emotional Therapy by Libby Seery  | 3,08 | 2,40 | 4,38 | 3,33 | 2,21 |
| MoodMission - Cope with Stress, Moods & Anxiety    | 3,08 | 2,30 | 3,13 | 3,67 | 3,21 |
| Stress Less Cards                                  | 3,04 | 2,40 | 4,63 | 3,83 | 1,29 |
| Fantasiereise mit Aut Training                     | 3,03 | 2,10 | 4,38 | 3,00 | 2,64 |

|                                                                        |      |      |      |      |      |
|------------------------------------------------------------------------|------|------|------|------|------|
| Meditation, Mindfulness & Relaxation by MT                             | 3,01 | 2,70 | 3,88 | 3,17 | 2,29 |
| Headspace - Meditation , Mindfulness & Motivation                      | 3,00 | 1,80 | 5,00 | 3,00 | 2,21 |
| HeartsApp                                                              | 2,97 | 2,50 | 3,88 | 3,50 | 2,00 |
| Pocket Meditation - Daily Stress & Anxiety Relief                      | 2,96 | 2,00 | 4,50 | 4,33 | 1,00 |
| Otemi VR                                                               | 2,95 | 2,20 | 4,00 | 3,67 | 1,93 |
| MindPilot - Mindfulness App                                            | 2,94 | 2,80 | 3,88 | 2,67 | 2,43 |
| Stress Less Cards                                                      | 2,94 | 2,20 | 4,38 | 3,17 | 2,00 |
| Mindset                                                                | 2,93 | 3,10 | 3,38 | 3,33 | 1,93 |
| Otemi                                                                  | 2,92 | 2,10 | 4,00 | 3,67 | 1,93 |
| wingwave                                                               | 2,92 | 2,00 | 3,88 | 3,17 | 2,64 |
| Guided Meditation Free App                                             | 2,90 | 2,30 | 4,25 | 3,33 | 1,71 |
| Meditation in Motion                                                   | 2,85 | 2,30 | 3,50 | 3,17 | 2,43 |
| Meditieren lernen                                                      | 2,82 | 1,60 | 4,38 | 2,50 | 2,79 |
| Atemübungen und Pranayama Techniken                                    | 2,78 | 2,50 | 4,25 | 2,67 | 1,71 |
| Zen                                                                    | 2,75 | 2,10 | 3,63 | 4,00 | 1,29 |
| Calmcast                                                               | 2,74 | 2,70 | 3,50 | 2,83 | 1,93 |
| Entspannung PUR                                                        | 2,67 | 2,50 | 4,00 | 2,33 | 1,86 |
| Stressbusters Wellness                                                 | 2,65 | 2,60 | 3,13 | 2,50 | 2,36 |
| Ease My Stress & Anxiety                                               | 2,64 | 1,40 | 4,00 | 3,17 | 2,00 |
| Mindfulness2Go                                                         | 2,63 | 2,10 | 3,25 | 2,67 | 2,50 |
| My Healthy Treasure Chest                                              | 2,59 | 1,80 | 4,13 | 2,00 | 2,43 |
| Mindful meditate, relax, sleep                                         | 2,56 | 1,90 | 4,00 | 2,83 | 1,50 |
| Free relaxation techniques.                                            | 2,38 | 1,70 | 4,00 | 2,67 | 1,14 |
| Relaxation techniques                                                  | 2,35 | 1,50 | 3,50 | 2,33 | 2,07 |
| Relaxation Techniques & Stress Management- Effective Techniques & Tips | 2,26 | 2,30 | 2,88 | 1,67 | 2,21 |
| Mindfulness2Go                                                         | 2,19 | 1,50 | 2,63 | 2,33 | 2,29 |
| Entspannungstechniken                                                  | 2,17 | 1,50 | 3,88 | 2,00 | 1,29 |

|                                                   |      |      |      |      |      |
|---------------------------------------------------|------|------|------|------|------|
| Stress Relief Hypnosis: Anxiety,<br>Relax & Sleep | 2,07 | 1,70 | 3,13 | 2,17 | 1,29 |
| Shrinkinabox                                      | 2,06 | 2,40 | 2,63 | 1,50 | 1,71 |

---
