# Supplementary material for: Stress Management Apps: Systematic Search and Multidimensional Assessment of Quality and Characteristics
Source: PubMed Central journal article supplement (PMC10498318; doi:10.2196/42415), 2023-08-29
Supplement: mhealth_v11i1e42415_app5.pdf [file mhealth_v11i1e42415_app5.pdf]

## Multimedia Appendix 5. Overview of stress management apps with an evidence base.

| Reference                            | Study type/<br>design       | App                              | App<br>usage<br>(week)                     | Sample                                                   | Mean<br>age (SD)                    | Female<br>(%)     | Target<br>group                                                | Measure-<br>ment time<br>points                                                      | Measured<br>variables                                                                                                                                     | Main results                                                                                                                                                                                                                                                                                                                                                                                       |
|--------------------------------------|-----------------------------|----------------------------------|--------------------------------------------|----------------------------------------------------------|-------------------------------------|-------------------|----------------------------------------------------------------|--------------------------------------------------------------------------------------|-----------------------------------------------------------------------------------------------------------------------------------------------------------|----------------------------------------------------------------------------------------------------------------------------------------------------------------------------------------------------------------------------------------------------------------------------------------------------------------------------------------------------------------------------------------------------|
| Bakker & Rickard, 2019 [65]          | Panel study                 | MoodMission                      | 4 (30 days)                                | 671                                                      | 27 (10.9)                           | 71                | General population                                             | Baseline<br>Post intervention                                                        | -depression<br>-anxiety<br>-wellbeing                                                                                                                     | <i>Only within group comparisons:</i><br>Significant differences only for wellbeing in favor of the app                                                                                                                                                                                                                                                                                            |
| Flett et al., 2019 [66]              | Randomized controlled trial | Head-space <sup>1</sup>          | 1.5 (10 days)<br>+30 days app availability | 145 IG<br>(App): 72<br>CG (Organization app): 73         | 20 (2.01)                           | 70                | University students                                            | Baseline<br>Post intervention (after 10 days)<br>Follow up (after 40 days)           | -depressive symptoms<br>-anxiety<br>-stress<br>-college adjustment<br>-flourishing<br>-resilience<br>-mindfulness                                         | <i>Between group comparisons:</i><br>Significant differences in depressive symptoms, anxiety, stress, college adjustment and mindfulness in favor of the app at post intervention<br><br>Significant differences in anxiety, stress, college adjustment, resilience and mindfulness in favor of the app at follow up                                                                               |
| Fuller-Tyszkiewicz et al., 2020 [63] | Randomized controlled trial | StressLess                       | 5                                          | 183 IG<br>(App): 73<br>CG (App for self-monitoring): 110 | 40 (6.27)                           | 95                | Caregiver for family/friends with a physical/mental disability | Baseline<br>Post intervention<br>Follow up (3 months post intervention)              | -depression<br>-anxiety<br>-stress<br>-well-being<br>-self-esteem<br>-optimism<br>-primary and secondary control<br>-social support                       | <i>Between group comparisons (baseline – post intervention):</i><br>Significant differences in depression, anxiety, stress and well-being in favor of the app and secondary control in favor of the CG<br><br><i>Between group comparisons (post intervention – follow up):</i><br>Significant differences in depression, well-being, self-esteem, optimism and social support in favor of the app |
| Moberg et al., 2019 [62]             | Randomized controlled trial | Sanvello (former name: Pacifica) | 4                                          | 500 IG<br>(App): 253<br>WCG: 247                         | 30 (10.9)                           | 75                | Adults with mild to moderate anxiety or depression             | Baseline<br>Post intervention<br>Follow-up (2 months post intervention; but only IG) | -stress<br>-anxiety<br>-depression<br>-self-efficacy                                                                                                      | <i>Between group comparisons:</i><br>Significant differences for all variables in favor of the app at post intervention                                                                                                                                                                                                                                                                            |
| Möltner et al., 2018 [61]            | Randomized controlled trial | 7mind                            | 2                                          | 306 IG<br>(App): 146<br>WCG: 160                         | 43 (10.36)                          | 69                | Employed individuals                                           | Baseline<br>Post intervention                                                        | -Mindfulness<br>-Work engagement<br>-Job satisfaction<br>-Innovation and creativity<br>-Emotional exhaustion<br>-Emotional intelligence<br>-Self efficacy | <i>Between group comparisons:</i><br>Significant differences for all variables in favor of the app                                                                                                                                                                                                                                                                                                 |
| Nagel et al., 2019 [60]              | Partially randomized trial  | AOK Relax                        | 6                                          | 94 IG 1 (only app): 17<br>IG 2                           | 21 (2.46)<br>21 (2.00)<br>22 (2.73) | 100<br>100<br>100 | University students                                            | Baseline<br>Post intervention                                                        | Perceived stress<br>Mindfulness<br>Well being                                                                                                             | <i>Only within group comparisons:</i><br>- Significant differences only in IG 3 for all variables in favor of the program                                                                                                                                                                                                                                                                          |

|                         |                             |         |   |                                                                     |    |    |                    |                                   |                                                                                                                       |                                                                                                    |
|-------------------------|-----------------------------|---------|---|---------------------------------------------------------------------|----|----|--------------------|-----------------------------------|-----------------------------------------------------------------------------------------------------------------------|----------------------------------------------------------------------------------------------------|
|                         |                             |         |   | (App + 22 (2.63) 63<br>SMP):<br>8                                   |    |    |                    |                                   |                                                                                                                       |                                                                                                    |
|                         |                             |         |   | IG 3<br>(only<br>SMP):<br>12                                        |    |    |                    |                                   |                                                                                                                       |                                                                                                    |
|                         |                             |         |   | CG:<br>57                                                           |    |    |                    |                                   |                                                                                                                       |                                                                                                    |
| Parks et al., 2018 [59] | Randomized controlled trial | Happify | 8 | 4,485 IG (Platform + App): 2,275<br><br>CG (psychoeducation): 2,210 | NA | 86 | General population | Baseline<br><br>Post intervention | -depressive symptoms<br>-anxiety symptoms<br>-resilience (including items on stress, positive emotionality, optimism) | <i>Between group comparisons:</i><br>Significant differences for all variables in favor of the app |

SD, standard deviation; IG, intervention group; CG, control group; WCG, waitlist control group; NA, not available.

**Note:** The remaining four of the 11 scientific publications are not listed here in detail, as they are pilot studies [67-69] and a conference paper [70].

<sup>1</sup>This study was chosen exemplarily. The Headspace app has been evaluated in several other studies [64,71-77]. This table may be incomplete as no systematic search was carried out.
